# Supplementary material for: Regional Citrate Anticoagulation in Continuous Renal Replacement Therapy: Is Metabolic Fear the Enemy of Logic? A Systematic Review and Meta-Analysis of Randomised Controlled Trials
Source: MDPI journal article supplement (doi:10.3390/life13051198), 2023-05-17
Supplement: s1 [file s1]

# Regional Citrate Anticoagulation in Continuous Renal Replacement Therapy: Is Metabolic Fear the Enemy of Logic? A Systematic Review and Meta-Analysis of Randomised Controlled Trials

Rita Jacobs <sup>1,\*</sup>, Walter Verbrugghe <sup>1</sup>, Karolien Dams <sup>1</sup>, Ella Roelant <sup>2</sup>, Marie Madeleine Couttenye <sup>3,4</sup>, Dirk Devroey <sup>5</sup> and Philippe Jorens <sup>1,4</sup>

## Supplementary materials

**Table S1:** Comparisons in evidence according to GRADE: Citrate versus heparin anticoagulation CRRT

| Certainty assessment |              |               |             |              |                  | N of patients/events |                 | Effect                         |                                                        | Certainty        |
|----------------------|--------------|---------------|-------------|--------------|------------------|----------------------|-----------------|--------------------------------|--------------------------------------------------------|------------------|
| N of studies         | Risk of bias | Inconsistency | Imprecision | Indirectness | Publication bias | Citrate              | heparin         | Relative (95% CI)              | Absolute (95% CI)                                      |                  |
| 12                   | serious      | serious       | Not serious | Not serious  | Undetected       | 926                  | 998             | -                              | median <b>14.52 h longer</b> (7.22 to 21.83)           | ⊕⊕○○<br>Low      |
| 12                   | serious      | Not serious   | serious     | Not serious  | Undetected       | 35/815 (4.3%)        | 117/812 (14.4%) | <b>RR 0.32</b> (0.22 tot 0.47) | <b>98 less per 1.000</b> (from 112 less to 76 less)    | ⊕⊕○○<br>Low      |
| 9                    | serious      | Not serious   | serious     | Not serious  | Undetected       | 28/638 (4.4%)        | 7/631 (1.1%)    | <b>RR 3.81</b> (1.67 tot 8.66) | <b>31 more per 1.000</b> (from 7 more to 85 more)      | ⊕⊕○○<br>Low      |
| 6                    | serious      | Not serious   | serious     | Not serious  | Undetected       | 122/347 (35.2%)      | 110/336 (32.7%) | <b>RR 1.08</b> (0.89 tot 1.31) | <b>26 more per 1.000</b> (from 36 less to 101 more)    | ⊕⊕○○<br>Low      |
| 7                    | serious      | Not serious   | serious     | Not serious  | Undetected       | 35/686 (5.1%)        | 20/683 (2.9%)   | <b>RR 1.71</b> (0.99 tot 2.93) | <b>21 more per 1.000</b> (from 0 less to 57 more)      | ⊕⊕○○<br>Low      |
| 8                    | serious      | Not serious   | serious     | Not serious  | Undetected       | 25/599 (4.2%)        | 26/610 (4.3%)   | <b>RR 1.46</b> (0.52 tot 4.11) | <b>20 more per 1.000</b> (from 20 less to 133 more)    | ⊕⊕○○<br>Low      |
| 6                    | serious      | Not serious   | serious     | serious      | Undetected       | 14/716 (2.0%)        | 17/727 (2.3%)   | <b>RR 1.83</b> (0.40 tot 8.38) | <b>19 more per 1.000</b> (from 14 less to 173 more)    | ⊕○○○<br>Very low |
|                      |              |               |             |              |                  |                      | 0.0%            |                                | <b>0 minder per 1.000</b> (from 0 minder tot 0 minder) |                  |
| 8                    | serious      | Not serious   | Not serious | Not serious  | Undetected       | 338/704 (48.0%)      | 334/705 (47.4%) | <b>RR 1.02</b> (0.93 tot 1.12) | <b>9 more per 1.000</b> (from 33 less to 57 more)      | ⊕⊕⊕○<br>Moderate |
| 7                    | serious      | Not serious   | serious     | Not serious  | Undetected       | 17/727 (2.3%)        | 31/732 (4.2%)   | <b>RR 0.62</b> (0.33 tot 1.15) | <b>16 less per 1.000</b> (from 28 less to 6 more)      | ⊕⊕○○<br>Low      |

CI: Confidence interval; RR: Risk ratio

**Figure S1 : Forest plots and TSA of electrolyte disorders**

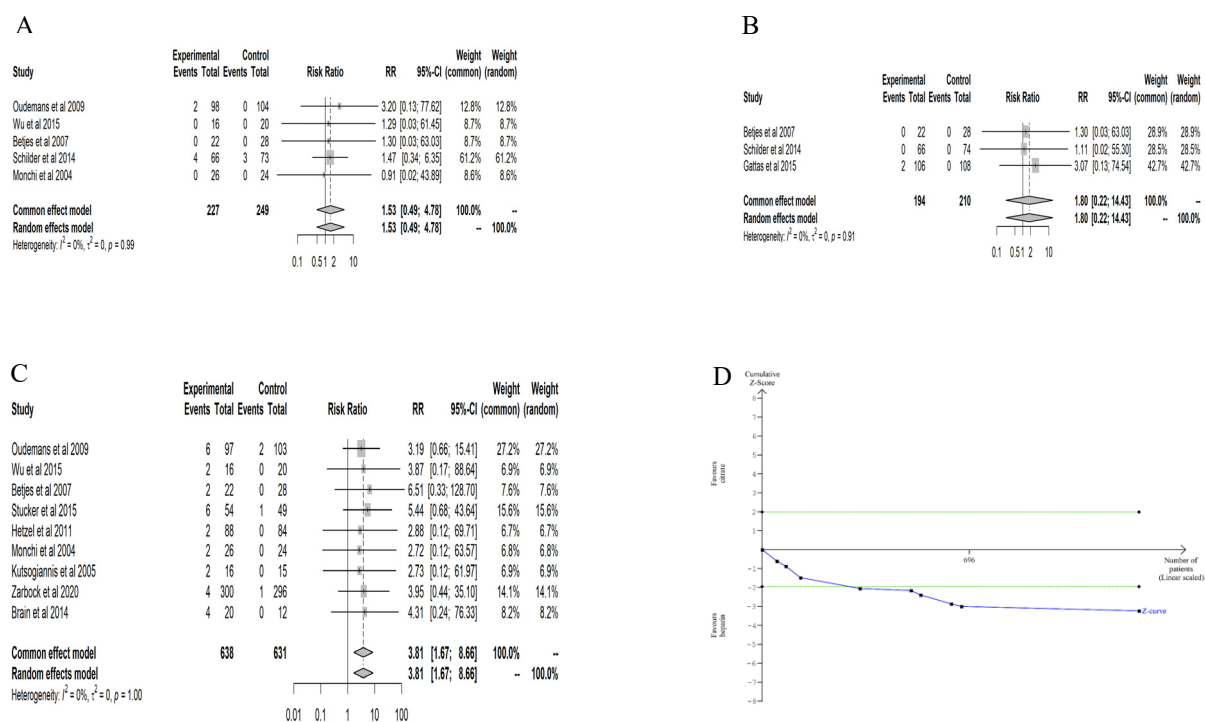

A: fixed effect model RR for hyponatremia for citrate versus heparin 1.53 [0.49,4.78];  $p=0.467$ .

B: fixed effect model RR for hypercalcemia for citrate versus heparin 1.80 [0.22,14.43];  $p=0.582$ .

C: fixed effect model: RR for hypocalcemia for citrate versus heparin 3.81 [1.67,8.66];  $p=0.001$ .

D: fixed effect model model of trial sequential analysis for hypocalcemia. A diversity-adjusted information size of 64219 participants calculated on a hypocalcemia rate of 1.11% in the heparin group, relative risk reduction 20%,  $\alpha=5\%$  (two sided),  $\beta=20\%$ ,  $I^2=0\%$ . Boundary required information size is ignored due to too little information use (1.97%). The cumulative Z-curve stays crosses the conventional boundary for benefit.

Figure S2 : Forest plot and TSA of citrate accumulation

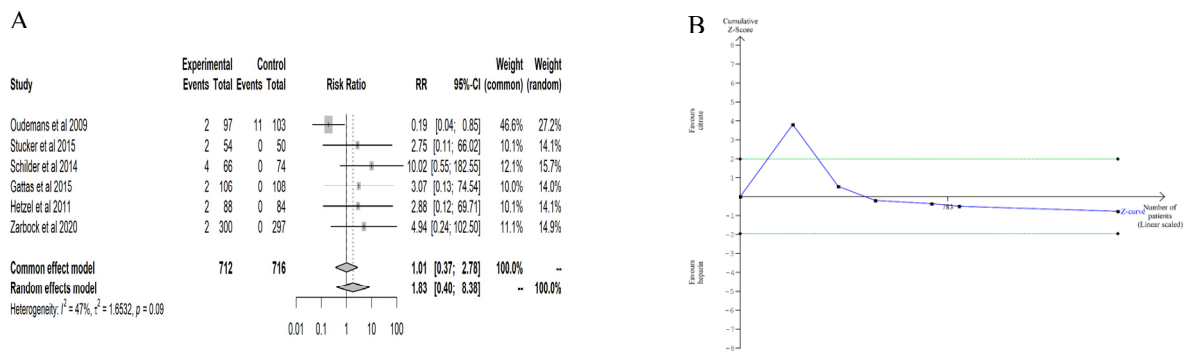

A: random effects model RR of citrate accumulation in citrate versus heparin 1.83 [0.40,8.38];  $p=0.438$ .

B: random effects model of trial sequential analysis for citrate accumulation. A diversity-adjusted information size of 82586 participants calculated on a citrate accumulation rate of 1.89% in the heparin group, relative risk reduction 20%,  $\alpha=5\%$  (two sided),  $\beta=20\%$ ,  $I^2=56.01\%$ . Boundary required information size is ignored due to too little information use (1.73%).

**Figure S3: funnel plot and TSA of filter lifespan**

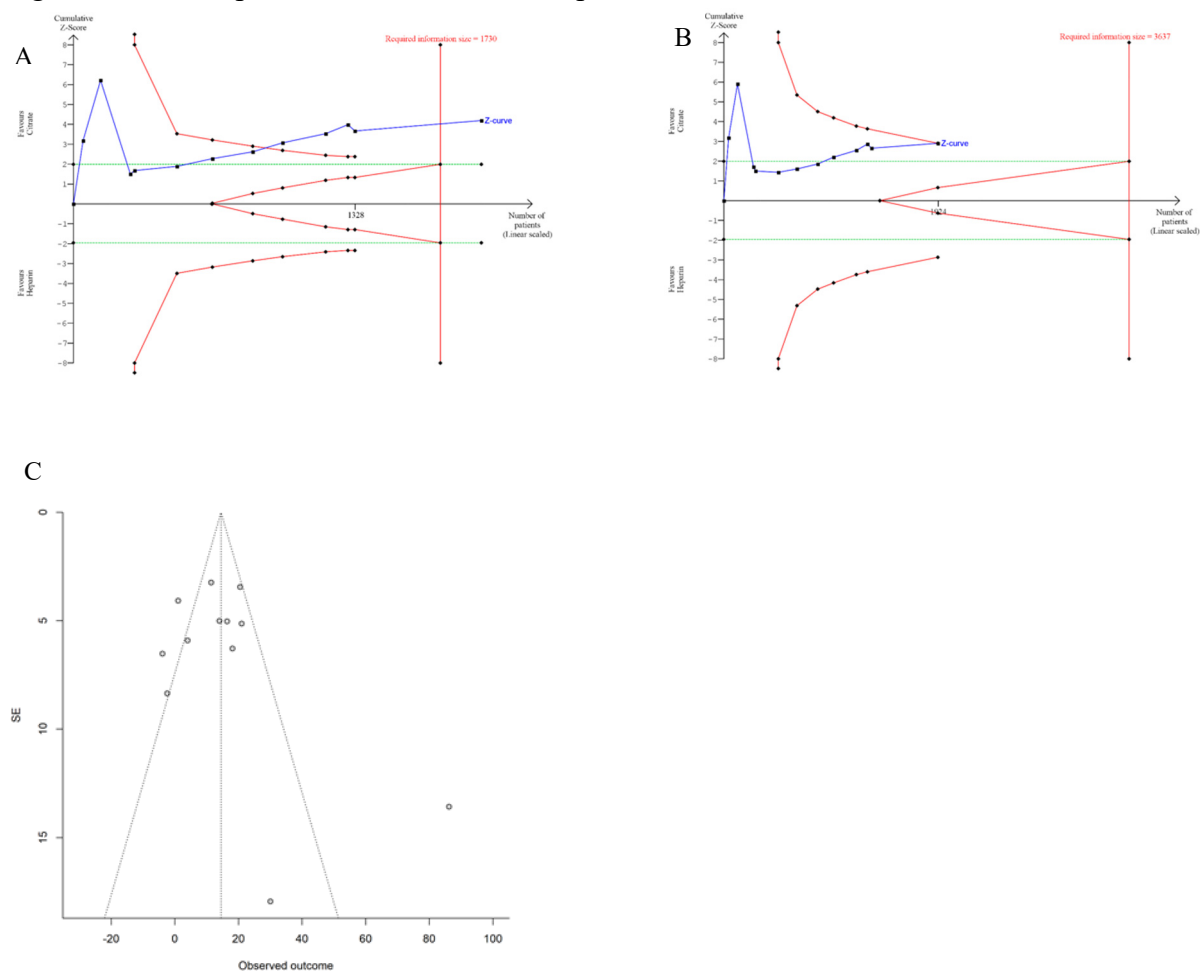

A: trial sequential analysis with the DL approach for filter lifespan. A diversity-adjusted information size of 1730 patients was calculated on a mean difference of 14.71, variance of 1616.87,  $I^2=86.42\%$ ,  $\alpha=5\%$  (two sided) and  $\beta=20\%$ . The cumulative Z-curve crosses the conventional boundary for benefit and the trial sequential monitoring boundary.

B: trial sequential analysis with the Sidik-Jonkman (SJ) approach for filter lifespan. A diversity-adjusted information size of 3637 patients was calculated based on a mean difference of 16.06, variance of 1616.87,  $I^2=94.58\%$ ,  $\alpha=5\%$  (two sided) and  $\beta=20\%$ . Two trials (Wu and Fealy) are ignored in interim looks due to too low information use ( $<1.0\%$ ). The cumulative Z-curve crosses the conventional boundary for benefit and hits the trial sequential monitoring boundary.

C: funnel plot of filter life span

**Figure S4: forest plots and TSA of subgroup analysis for filter lifespan on modality of CRRT**

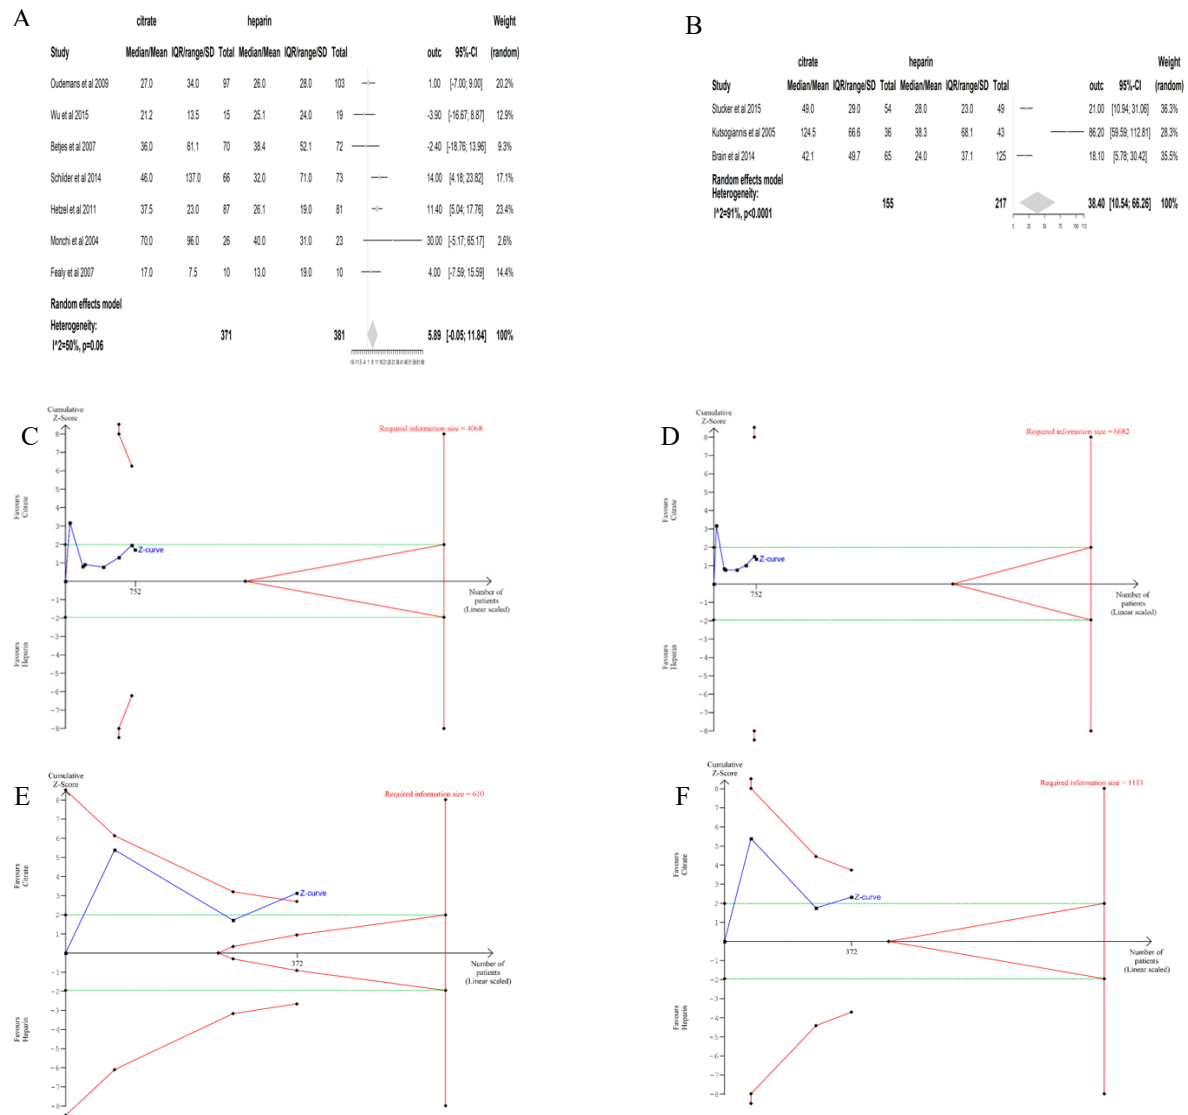

A: due to heterogeneity ( $p=0.06$ ,  $I^2=49.6\%$ ,  $H^2=1.98$  with the random effects model for the CVVH modality between citrate and heparin, we found no difference in median filter life of 5.89h with a 95% CI [-0.05,11.84];  $p=0.052$ .

B: random effects model due to heterogeneity was use ( $p<0.0001$ ,  $I^2=90.96\%$ ,  $H^2=11.07$ . A difference in median filter life between citrate and heparin for the CVVHDF modality was found of 38.4h with 95% CI [10.54,66.26]; $p=0.007$ .

C: trial sequential analysis with the DL approach for CVVH modality. A diversity-adjusted information size of 4068 patients was calculated based on a mean difference of 8.05, variance of 1151.66,  $I^2=86.29\%$ ,  $\alpha=5\%$  (two sided) and  $\beta=20\%$ . Two trials (Wu and Fealy) are ignored in interim looks due to too low information use ( $<1.0\%$ ).

D: trial sequential analysis with the SJ approach for CVVH modality. A diversity-adjusted information size of 6682 patients was calculated based on a mean difference of 8.86, variance of 1151.66,  $I^2=93.1\%$ ,  $\alpha=5\%$  (two sided) and  $\beta=20\%$ . Three trials (Monchi, Wu and Fealy) are ignored in interim looks due to too low information use ( $<1.0\%$ ). The cumulative Z-curve does not cross the conventional boundary or the trial sequential monitoring boundary.

E: trial sequential analysis with the DL approach for CVVHDF modality. A diversity-adjusted information size of 610 patients was calculated based on a mean difference of 30.49, variance of 2298.45,  $I^2=87.23\%$ ,  $\alpha=5\%$  (two sided) and  $\beta=20\%$ . The cumulative Z-curve crosses the conventional boundary and the trial sequential monitoring boundary.

F: Trial sequential analysis with the SJ approach for CVVHDF modality. A diversity-adjusted information size of 1113 patients was calculated because of a mean difference of 31.97, variance of 2298.45,  $I^2=93.62\%$ ,  $\alpha=5\%$  (two sided) and  $\beta=20\%$ . The cumulative Z-curve crosses the conventional boundary but not the trial sequential monitoring boundary.

Figure S5: forest plots and TSA of subgroup analysis- dilution mode

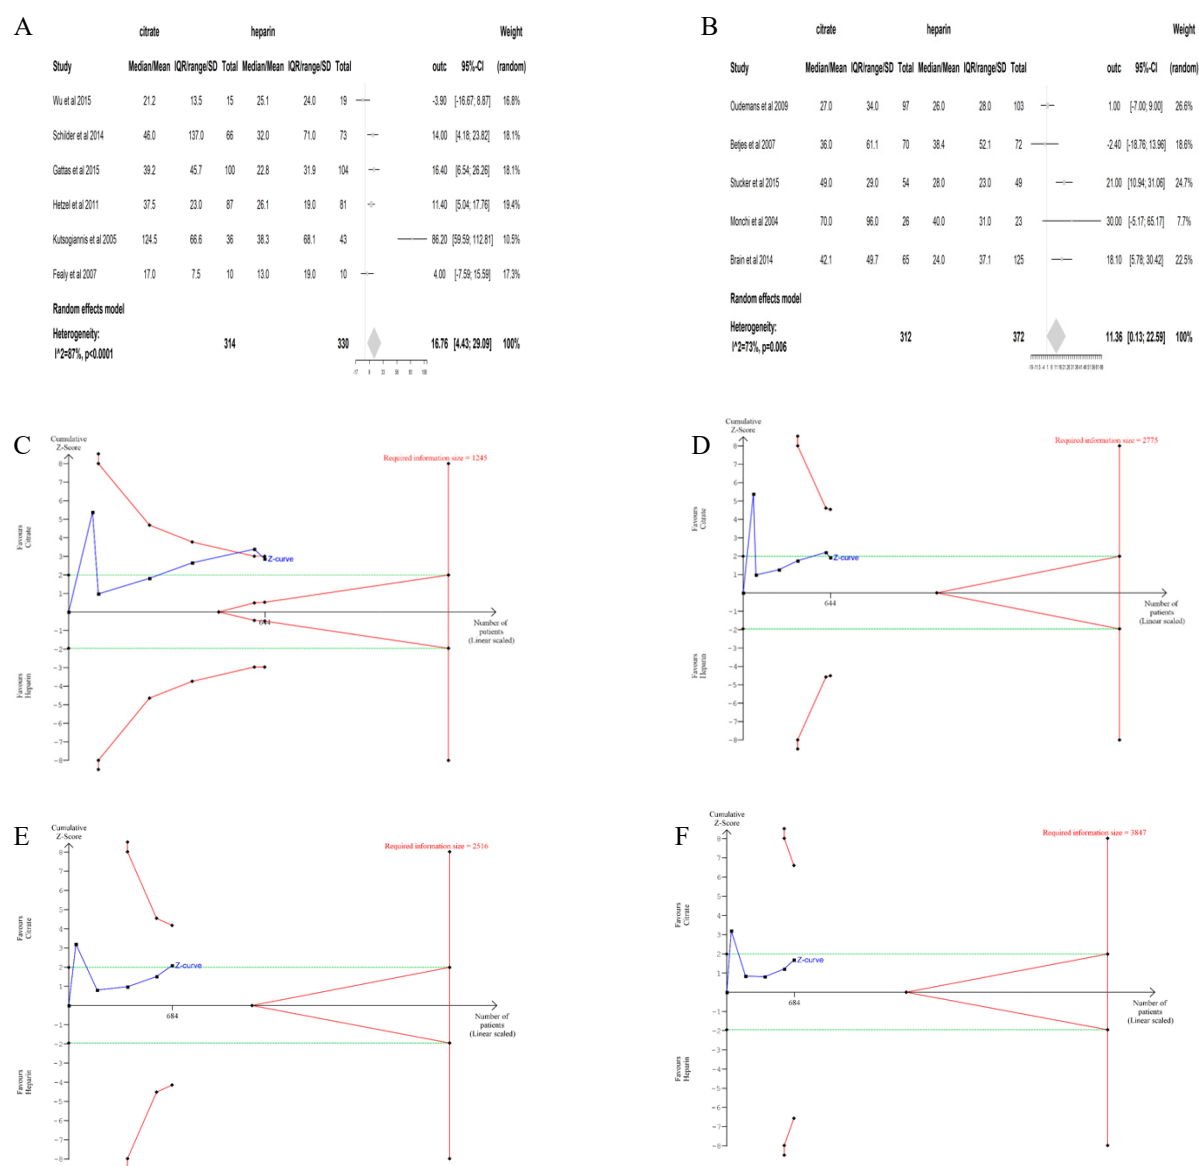

A: random effects model for predilution subgroup was used due to heterogeneity ( $p<0.0001$ ,  $I^2=87.1\%$ ,  $H^2=7.7$  a significant difference in median filter life was found between citrate and heparin: 16.76h with a 95% CI [4.43,29.09];  $p=0.008$ .

B: due to heterogeneity ( $p=0.006$ ,  $I^2=72.5\%$ ,  $H^2=3.6$  with the random effects model a difference in median filter life for the postdilution subgroup of 11.36h with a 95% CI [0.13,22.59];  $p=0.047$  between citrate and heparin.

C: trial sequential analysis with the DL approach for predilution subgroup. A diversity-adjusted information size of 1245 patients was calculated based on a mean difference of 16.55, variance of 1160.09,  $I^2=89.24\%$ ,  $\alpha=5\%$  (two sided) and  $\beta=20\%$ . The cumulative Z-curve crosses the conventional boundary and the trial sequential monitoring boundary.

D: trial sequential analysis with the SJ approach for predilution subgroup. A diversity-adjusted information size of 2775 patients was calculated based on a mean difference of 17.80, variance of 1160.09,  $I^2=95.86\%$ ,  $\alpha=5\%$  (two sided) and  $\beta=20\%$ . One trial (Fealy) is ignored in interim looks due to too low information use ( $<1.0\%$ ). The cumulative Z-curve crosses the conventional boundary but not the trial sequential monitoring boundary.

E: trial sequential analysis with the DL approach for postdilution subgroup. A diversity-adjusted information size of 2516 patients was calculated based on a mean difference of 13.20, variance of 1823.71,  $I^2=86.92\%$ ,  $\alpha=5\%$  (two sided) and

beta=20%. The cumulative Z-curve hits the conventional boundary and does not cross the trial sequential monitoring boundary.

F: trial sequential analysis with the SJ approach for postdilution subgroup. A diversity-adjusted information size of 3847 patients was calculated based on a mean difference of 14.36, variance of 1823.71,  $I^2=92.77\%$ , alpha=5% (two sided) and beta=20%. The cumulative Z-curve does not cross the conventional boundary or the trial sequential monitoring boundary

---



Figure S6: forest plots and TSA on secondary outcomes.

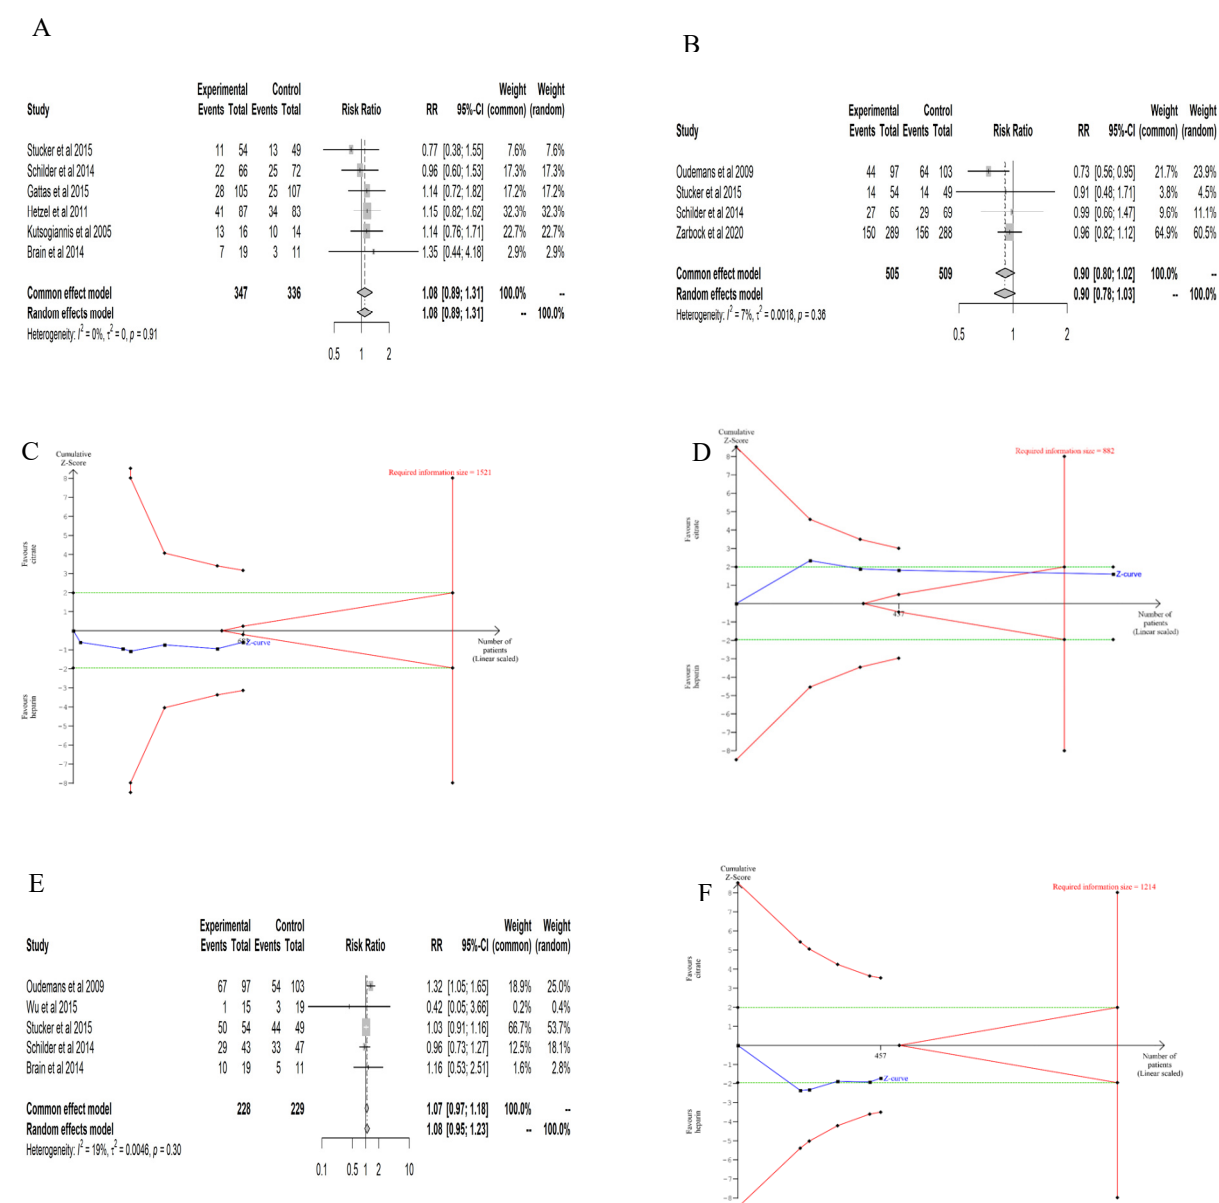

A: fixed-effect model on 28d mortality a RR of 1.08 [0.89,1.31];  $p=0.424$  was found on 28 days of mortality in the citrate group versus heparin group.

B: fixed-effect model on 90-day mortality a RR of 0.90 [0.80,1.02];  $p=0.110$  was found on 90-day mortality in citrate group versus heparin group.

C: fixed-effect model of trial sequential analysis for 28d-mortality. A diversity-adjusted information size of 1521 participants calculated based on a 28d-mortality rate of 32.74% in the heparin group, relative risk reduction 20%,  $\alpha=5\%$  (two sided),  $\beta=20\%$ ,  $I^2=0\%$ . The cumulative Z-curve does not cross the futility boundary.

D: fixed-effect model of trial sequential analysis for 3-months mortality. A diversity-adjusted information size of 882 participants calculated on the basis of a 3-months mortality rate of 51.67% in the heparin group, relative risk reduction 20%,  $\alpha=5\%$  (two sided),  $\beta=20\%$ ,  $I^2=17.08\%$ . The cumulative Z-curve crosses the futility boundary and enters the futility area.

E: fixed effects model of renal recovery a RR of 1.07 [0.97,1.18];  $p=0.176$  between the citrate group and the heparin group.

F: fixed-effect model of trial sequential analysis for renal recovery. A diversity-adjusted information size of 1214 participants calculated based on a renal recovery rate of 60.70% in the heparin group, relative risk reduction 20%, alpha=5% (two sided), beta=20%,  $I^2=56.54\%$ .
